# Supplementary material for: Charge-switchable gold nanoparticles for enhanced enzymatic thermostability
Source: Royal Society of Chemistry journal article supplement (doi:10.1039/c5cp03021h), 2015-01-01
Supplement: c5cp03021h1.pdf [file c5cp03021h1.pdf]

## Supporting Information

### Charge-switchable gold nanoparticles for enhanced enzymatic thermostability

Shiv Shankar,<sup>a</sup> Sarvesh K. Soni,<sup>b</sup> Hemant K. Daima,<sup>a,b,c</sup> PR. Selvakannan,<sup>b</sup> Jayant M. Khire,<sup>d</sup> Suresh K. Bhargava,<sup>b</sup> Vipul Bansal<sup>a,\*</sup>

<sup>a</sup>Ian Potter NanoBiosensing Facility, NanoBiotechnology Research Laboratory (NBRL), School of Applied Sciences, RMIT University, GPO Box 2476V, Melbourne, VIC 3001, Australia

<sup>b</sup>Center for Advanced Materials and Industrial Chemistry (CAMIC), School of Applied Sciences, RMIT University, GPO Box 2476V, Melbourne, VIC 3001, Australia

<sup>c</sup>Nano-Bio Interfacial Research Laboratory (NBIRL), Department of Biotechnology, Siddaganga Institute of Technology, Tumkur 572103, Karnataka, India

<sup>d</sup>National Collection of Industrial Microorganisms, National Chemical Laboratory, Pune 411008, Maharashtra, India

\*Corresponding Author: Tel: +61 3 99252121; Fax: +61 3 99253747; E-mail (V.B.): vipul.bansal@rmit.edu.au; E-mail (S.K.B.): suresh.bhargava@rmit.edu.au

| S. No. | Phytase (µg) | AuNPs <sup>Tyr</sup> (ppm Au) | Reaction volume (mL) | Phytase binding to AuNPs <sup>Tyr</sup> (%), i.e. immobilisation yield | Phytase activity in AuNPs <sup>Tyr</sup> /Phytase (% relative to native phytase), i.e. activity yield |
|--------|--------------|-------------------------------|----------------------|------------------------------------------------------------------------|-------------------------------------------------------------------------------------------------------|
| 1      | 1            | 0                             | 1                    | 0                                                                      | 0                                                                                                     |
| 2      | 1            | 78                            | 1                    | 15                                                                     | 17                                                                                                    |
| 3      | 1            | 156                           | 1                    | 60                                                                     | 38                                                                                                    |
| 4      | 1            | 234                           | 1                    | 96                                                                     | 95                                                                                                    |
| 5      | 1            | 312                           | 1                    | 97                                                                     | 94                                                                                                    |
| 6      | 1            | 390                           | 1                    | 100                                                                    | 92                                                                                                    |
| 7      | 0            | 234                           | 1                    | 0                                                                      | 0                                                                                                     |

**Table S1.** Immobilisation and activity yields of phytase enzyme during its biofunctionalisation on the surface of AuNPs<sup>Tyr</sup>.
